# Supplementary material
Source: MDPI journal article supplement (https://www.mdpi.com/2411-5142/6/2/36)

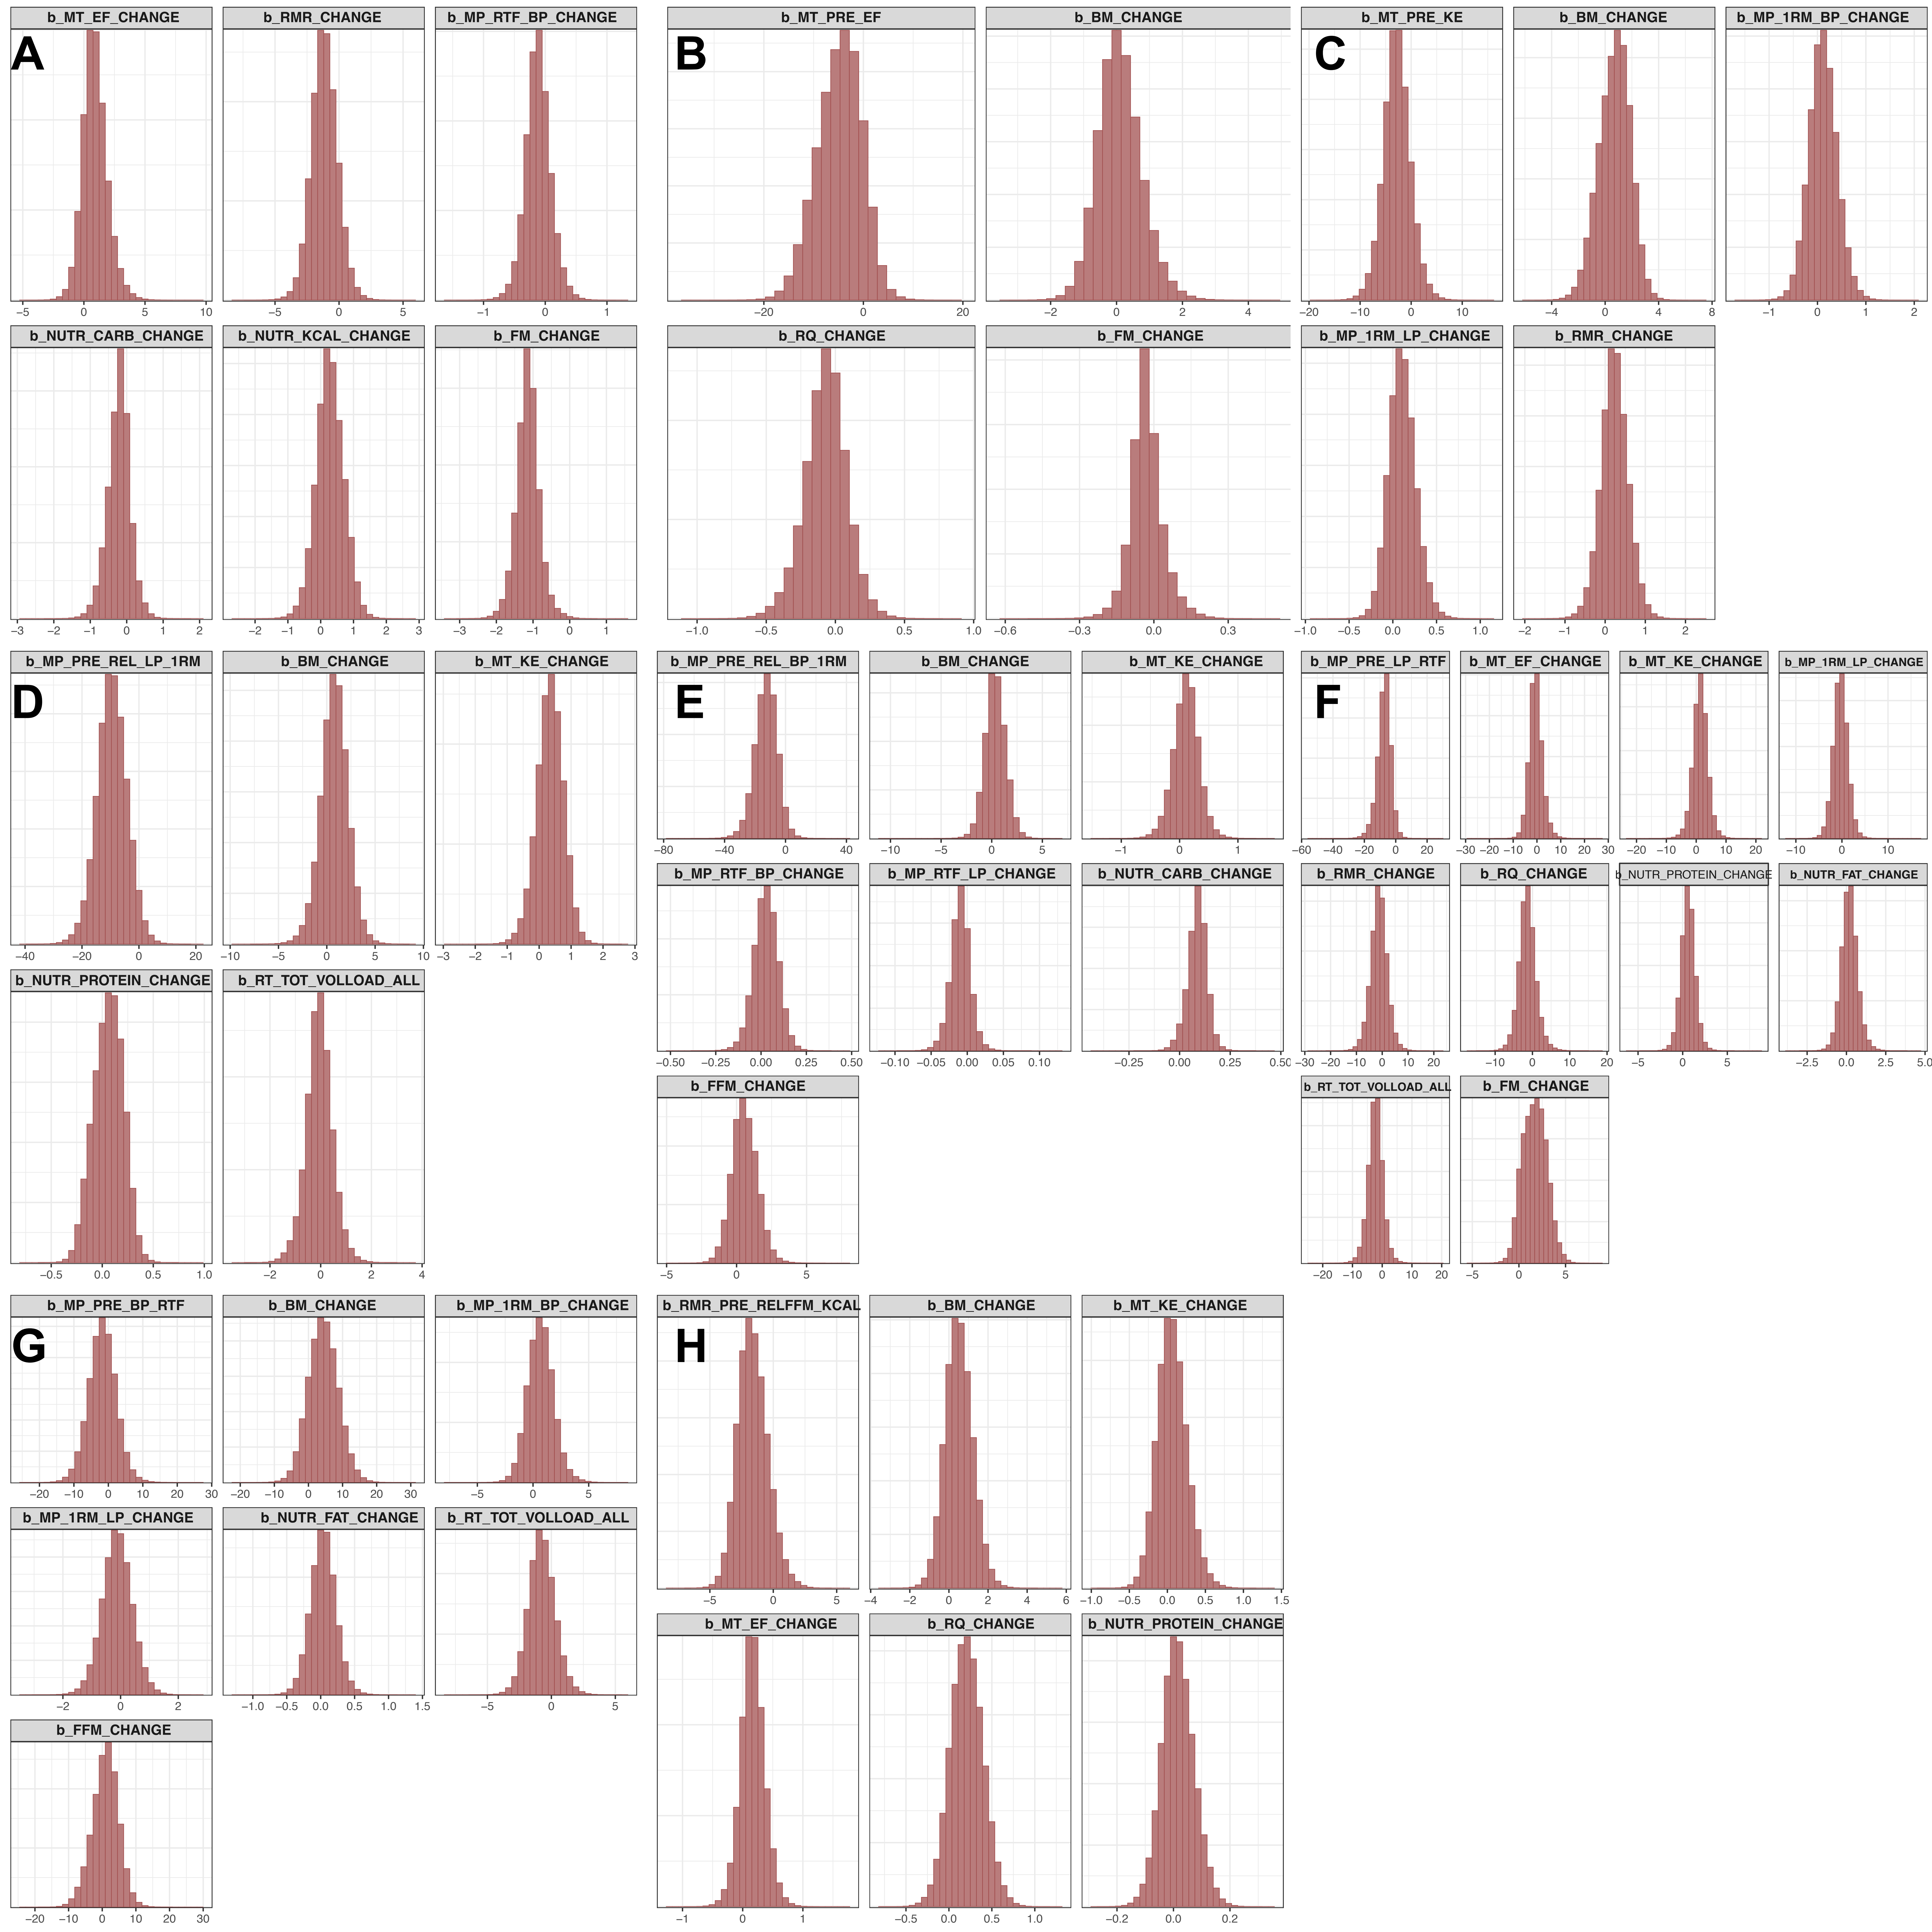

Supplement: s1 [file s1]

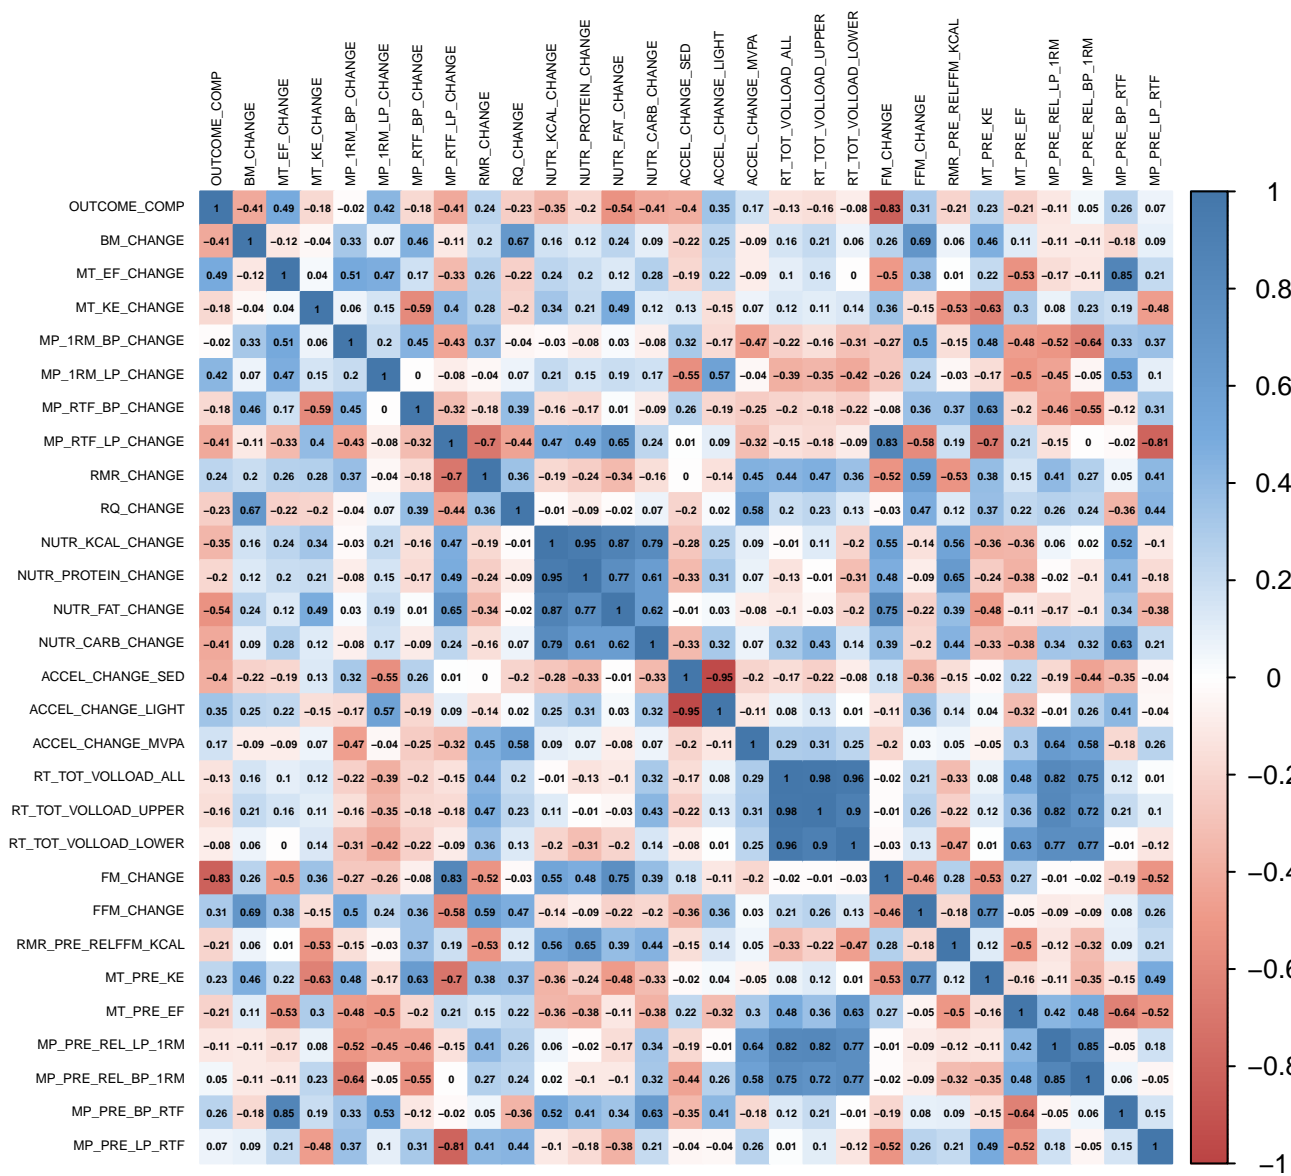

Supplement: s1 [file s1]

# Hierarchical Cluster Analysis

Hoeffding's D statistic

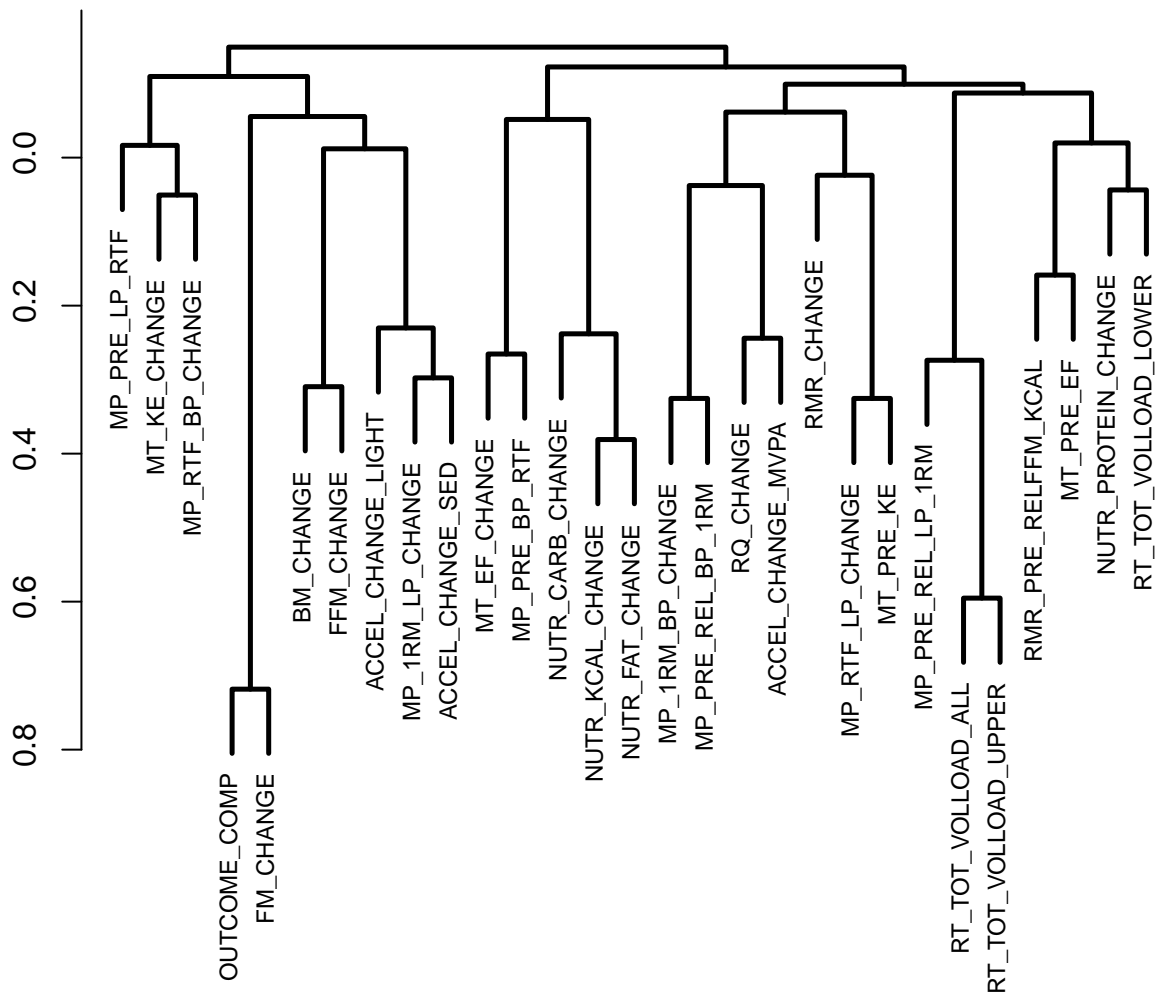

Supplement: s1 [file s1]
